# Supplementary material for: Protein–Phenolic Interactions as a Factor Affecting the Physicochemical Properties of White Bean Proteins
Source: MDPI journal article supplement (doi:10.3390/molecules24030408), 2019-01-23
Supplement: s1 [file s1]

**Table S1.** Desorption stability of protein–phenolic complexes affected by pH<sup>1</sup> and ionic strength<sup>1</sup>.

| Sample    |          | Phenolics desorption $\mu\text{mol/g protein} \pm \text{SD}$ |                         |                         |                         |
|-----------|----------|--------------------------------------------------------------|-------------------------|-------------------------|-------------------------|
|           |          | Albumins                                                     |                         | Globulins               |                         |
|           |          | pH 2                                                         | 1 M NaCl                | pH 2                    | 1 M NaCl                |
| Phenolics | GA       | 4.8 <sup>Ab</sup> ±0.49                                      | 1.8 <sup>Bc</sup> ±0.44 | 4.5 <sup>Aa</sup> ±0.34 | 2.9 <sup>Ab</sup> ±0.64 |
|           | FA       | 3.4 <sup>Ac</sup> ±0.45                                      | 2.2 <sup>Ac</sup> ±0.75 | 2.4 <sup>Bb</sup> ±0.52 | 1.9 <sup>Ab</sup> ±0.43 |
|           | CGA      | 3.6 <sup>Bc</sup> ±0.25                                      | 3.2 <sup>Ab</sup> ±0.53 | 4.7 <sup>Aa</sup> ±0.80 | 2.2 <sup>Bb</sup> ±0.26 |
|           | Q        | 1.2 <sup>Bd</sup> ±0.34                                      | n.d.                    | 2.5 <sup>Ab</sup> ±0.24 | 0.8 <sup>Ac</sup> ±0.23 |
|           | A        | n.d.                                                         | n.d.                    | n.d.                    | n.d.                    |
|           | CAT      | 6.4 <sup>Aa</sup> ±0.36                                      | 7.1 <sup>Aa</sup> ±0.8  | 5.4 <sup>Ba</sup> ±0.35 | 8.3 <sup>Aa</sup> ±0.93 |
| GT        | GCAT     | n.d.                                                         | n.d.                    | n.d.                    | n.d.                    |
|           | EGCAT    | 3.2 <sup>Ab</sup> ±0.44                                      | 0.9 <sup>Bb</sup> ±0.3  | 2.3 <sup>Bc</sup> ±0.35 | 1.8 <sup>Ab</sup> ±0.43 |
|           | CAT      | 8.3 <sup>Aa</sup> ±0.83                                      | 4.3 <sup>Ba</sup> ±0.4  | 7.3 <sup>Aa</sup> ±0.45 | 6.5 <sup>Aa</sup> ±0.35 |
|           | ECAT     | n.d.                                                         | n.d.                    | n.d.                    | n.d.                    |
|           | EGCATG   | 2.2 <sup>Bc</sup> ±0.23                                      | nd                      | 3.2 <sup>Ab</sup> ±0.45 | n.d.                    |
|           | ECATG    | n.d.                                                         | n.d.                    | n.d.                    | n.d.                    |
| GC        | NCGA     | 0.9 <sup>Ab</sup> ±0.21                                      | n.d.                    | n.d.                    | n.d.                    |
|           | CGA      | 6.5 <sup>Aa</sup> ±0.43                                      | 4.9 <sup>Aa</sup> ±0.24 | 7.2 <sup>Aa</sup> ±0.53 | 3.7 <sup>Ba</sup> ±0.36 |
|           | CCGA     | 1.2 <sup>Ab</sup> ±0.35                                      | n.d.                    | n.d.                    | n.d.                    |
|           | FQA      | n.d.                                                         | n.d.                    | n.d.                    | n.d.                    |
|           | 3,4-DCQA | n.d.                                                         | n.d.                    | n.d.                    | n.d.                    |
|           | 3,5-DCQA | n.d.                                                         | n.d.                    | n.d.                    | n.d.                    |
| GC        | 4,5-DCQA | n.d.                                                         | n.d.                    | n.d.                    | n.d.                    |

<sup>1</sup> stability of protein–phenolic complexes was also determined in pH 7 and 10 as well as in the presence of 0M NaCl; however, in these conditions, the analyzed compounds were not detected and the results are not presented in the table. Means ( $\pm$  SD, n = 3) with different lowercase letters superscript within the same column for phenolics, GT extracts, and GC extracts are significantly different ( $\alpha = 0.05$ ). Means with different bolded uppercase and normal letters superscript within a same row for pH 2 and ionic strength in the presence of 1 M NaCl are significantly different ( $\alpha = 0.05$ ), respectively. GA, FA, CGA, Q, A, CAT–gallic acid, ferulic acid, chlorogenic acid, quercetin, apigenin, catechin, respectively. Green tea (GT) compounds: GCAT ((–)-gallo catechin), EGCAT ((–)-epigallo catechin), CAT ((+)-catechin), ECAT ((–)-epicatechin), EGCATG ((–)-epigallo catechin-3-gallate), and (–)-epicatechin gallate (ECATG); Green coffee (GC) compounds: NCGA (neochlorogenic acid), CGA (chlorogenic acid), CCGA (cryptochlorogenic acid), FQA (3-feruloylquinic acid), 3,4-DCQA (3,4-dicafyloquinic acid), 3,5-DCQA (3,5-dicafyloquinic acid), 4,5-DCQA (4,5-dicafyloquinic acid).
